# Supplementary material for: Directed Partial Correlation: Inferring Large-Scale Gene Regulatory Network through Induced Topology Disruptions
Source: PLoS One. 2011 Apr 6;6(4):e16835. doi: 10.1371/journal.pone.0016835 (PMC3071805; doi:10.1371/journal.pone.0016835)
Supplement: Table S2 — GO enrichment for SVAR biclusters (Bonferroni adjusted -value 0.05). (XLS) [file pone.0016835.s003.xls]

## Sheet: svar.GO
Set	Enriched with	#genes	Raw p-value	Corrected p-Value	Frequency in set (%)
Bicluster_194	plastid - GO:0009536	23	7.081e-14	0.001	51.11
Bicluster_173	photosynthesis - GO:0015979	5	1.977e-11	0.001	62.5
Bicluster_244	plastid - GO:0009536	20	7.941e-11	0.001	45.45
Bicluster_103	cell redox homeostasis - GO:0045454	4	2.09e-09	0.001	44.44
Bicluster_90	cell redox homeostasis - GO:0045454	4	6.174e-09	0.001	36.36
Bicluster_103	endoplasmic reticulum - GO:0005783	5	7.979e-09	0.001	55.55
Bicluster_161	plastid part - GO:0044435	7	1.724e-08	0.002	36.84
Bicluster_186	photosynthesis - GO:0015979	4	2.294e-08	0.002	40
Bicluster_161	chloroplast - GO:0009507	11	3.427e-08	0.002	57.89
Bicluster_90	endoplasmic reticulum - GO:0005783	5	3.535e-08	0.002	45.45
Bicluster_85	nucleosome assembly - GO:0006334	4	9.944e-08	0.004	19.04
Bicluster_44	plastid part - GO:0044435	6	1.06e-07	0.005	40
Bicluster_139	chromatin assembly - GO:0031497	4	1.969e-07	0.005	20
Bicluster_94	response to stress - GO:0006950	10	4.008e-07	0.008	25
Bicluster_44	chloroplast - GO:0009507	9	4.191e-07	0.01	60
Bicluster_180	chloroplast - GO:0009507	16	4.551e-07	0.01	33.33
Bicluster_177	chloroplast - GO:0009507	8	6.092e-07	0.014	66.66
Bicluster_6	response to abiotic stimulus - GO:0009628	9	8.578e-07	0.017	23.07
Bicluster_44	organelle membrane - GO:0031090	6	8.739e-07	0.017	40
Bicluster_161	organelle envelope - GO:0031967	5	1.58e-06	0.024	26.31
Bicluster_6	response to temperature stimulus - GO:0009266	6	1.899e-06	0.028	15.38
Bicluster_41	organelle subcompartment - GO:0031984	5	2.011e-06	0.029	23.8
Bicluster_174	pigment biosynthetic process - GO:0046148	4	2.27e-06	0.034	10.81
Bicluster_191	plastid - GO:0009536	10	2.581e-06	0.04	45.45
